# Supplementary material for: Genetic surveillance in the Greater Mekong subregion and South Asia to support malaria control and elimination
Source: eLife. 2021 Aug 10;10:e62997. doi: 10.7554/eLife.62997 (PMC8354633; doi:10.7554/eLife.62997)
Supplement: Figure 3—figure supplement 1—source data 1. [file elife-62997-fig3-figsupp1-data1.xlsx]

## Sheet: Sheet1
Country	Province	K13Freq	Number of Records
Bangladesh	Chittagong	None	1528
Cambodia	Battambang	C580Y	31
Cambodia	Pailin	None	5
Cambodia	Pailin	C580Y	62
Cambodia	Preah Vihear	None	38
Cambodia	Preah Vihear	C580Y	68
Cambodia	Preah Vihear	Y493H	2
Cambodia	Preah Vihear	R539T	1
Cambodia	Pursat	None	38
Cambodia	Pursat	C580Y	262
Cambodia	Pursat	Y493H	18
Cambodia	Pursat	R539T	1
Cambodia	Ratanakiri	None	170
Cambodia	Ratanakiri	C580Y	149
Cambodia	Ratanakiri	Y493H	2
Cambodia	Ratanakiri	R539T	1
Cambodia	Ratanakiri	P553L	3
Cambodia	Steung Treng	None	5
Cambodia	Steung Treng	C580Y	66
Cambodia	Steung Treng	R539T	1
India	Odisha	None	79
India	Tripura	None	66
India	West Bengal	None	80
Lao PDR	Attapeu	None	142
Lao PDR	Attapeu	C580Y	112
Lao PDR	Attapeu	R539T	10
Lao PDR	Champasak	None	78
Lao PDR	Champasak	C580Y	143
Lao PDR	Champasak	R539T	2
Lao PDR	Salavan	None	153
Lao PDR	Salavan	C580Y	28
Lao PDR	Salavan	P574L	2
Lao PDR	Savannakhet	None	558
Lao PDR	Savannakhet	C580Y	43
Lao PDR	Savannakhet	Y493H	10
Lao PDR	Savannakhet	P574L	5
Lao PDR	Sekong	None	21
Lao PDR	Sekong	C580Y	2
Lao PDR	Sekong	Y493H	3
Myanmar	Bago	None	33
Myanmar	Kayin	None	318
Myanmar	Kayin	C580Y	18
Myanmar	Kayin	P441L	110
Myanmar	Kayin	F446I	75
Myanmar	Kayin	R561H	53
Myanmar	Kayin	G449A	55
Myanmar	Kayin	M476I	36
Myanmar	Kayin	C469F	5
Myanmar	Kayin	G538V	8
Myanmar	Mandalay	None	41
Myanmar	Mandalay	F446I	8
Myanmar	Mandalay	R561H	8
Myanmar	Rakhine	None	43
Thailand	Sisakhet	C580Y	80
Thailand	Tak	None	9
Thailand	Tak	C580Y	13
Thailand	Ubon Ratchathani	None	3
Thailand	Ubon Ratchathani	C580Y	14
Thailand	Ubon Ratchathani	R539T	2
Vietnam	Binh Phuoc	None	51
Vietnam	Binh Phuoc	C580Y	579
Vietnam	Dak Lak	None	9
Vietnam	Dak Lak	C580Y	214
Vietnam	Dak Nong	None	7
Vietnam	Dak Nong	C580Y	111
Vietnam	Gia Lai	None	120
Vietnam	Gia Lai	C580Y	611
Vietnam	Gia Lai	R539T	1
Vietnam	Gia Lai	P553L	1
Vietnam	Gia Lai	C469F	4
Vietnam	Khanh Hoa	None	53
Vietnam	Khanh Hoa	C580Y	2
Vietnam	Khanh Hoa	P553L	13
Vietnam	Ninh Thuan	None	21
Vietnam	Ninh Thuan	C580Y	3
Vietnam	Quang Tri	None	32
Vietnam	Quang Tri	C580Y	6
