# Supplementary material for: Genetic surveillance in the Greater Mekong subregion and South Asia to support malaria control and elimination
Source: eLife. 2021 Aug 10;10:e62997. doi: 10.7554/eLife.62997 (PMC8354633; doi:10.7554/eLife.62997)
Supplement: Figure 3—figure supplement 2—source data 1. [file elife-62997-fig3-figsupp2-data1.xlsx]

## Sheet: Sheet1
Country	Province	Measure Names	Measure Values
Bangladesh	Chittagong	PPQ-R	0
Cambodia	Battambang	PPQ-R	1
Cambodia	Pailin	PPQ-R	0.953846
Cambodia	Preah Vihear	PPQ-R	1
Cambodia	Pursat	PPQ-R	0.967033
Cambodia	Ratanakiri	PPQ-R	0.770588
Cambodia	Steung Treng	PPQ-R	0.754386
Congo PDR	Kinshasa	PPQ-R	0
India	Odisha	PPQ-R	0
India	Tripura	PPQ-R	0
India	West Bengal	PPQ-R	0
Lao PDR	Attapeu	PPQ-R	0.427928
Lao PDR	Champasak	PPQ-R	0.748603
Lao PDR	Salavan	PPQ-R	0.0208333
Lao PDR	Savannakhet	PPQ-R	0.0121654
Lao PDR	Sekong	PPQ-R	0.0625
Myanmar	Bago	PPQ-R	0
Myanmar	Kayin	PPQ-R	0.0188679
Myanmar	Mandalay	PPQ-R	0
Myanmar	Rakhine	PPQ-R	0
Thailand	Sisakhet	PPQ-R	0.941176
Thailand	Tak	PPQ-R
Thailand	Ubon Ratchathani	PPQ-R	0.75
Vietnam	Binh Phuoc	PPQ-R	0.922652
Vietnam	Dak Lak	PPQ-R	0.900862
Vietnam	Dak Nong	PPQ-R	0.92381
Vietnam	Gia Lai	PPQ-R	0.831378
Vietnam	Khanh Hoa	PPQ-R	0.047619
Vietnam	Ninh Thuan	PPQ-R	0.181818
Vietnam	Quang Tri	PPQ-R	0.0909091
