# Supplementary material for: Genetic surveillance in the Greater Mekong subregion and South Asia to support malaria control and elimination
Source: eLife. 2021 Aug 10;10:e62997. doi: 10.7554/eLife.62997 (PMC8354633; doi:10.7554/eLife.62997)
Supplement: Figure 3—figure supplement 3—source data 1. [file elife-62997-fig3-figsupp3-data1.xlsx]

## Sheet: Sheet1
Country	Province	Measure Names	Measure Values
Bangladesh	Chittagong	CQ-R	0.967057
Cambodia	Battambang	CQ-R	1
Cambodia	Pailin	CQ-R	1
Cambodia	Preah Vihear	CQ-R	1
Cambodia	Pursat	CQ-R	1
Cambodia	Ratanakiri	CQ-R	0.98722
Cambodia	Steung Treng	CQ-R	1
Congo PDR	Kinshasa	CQ-R	0.576923
India	Odisha	CQ-R	0.193878
India	Tripura	CQ-R	0.84058
India	West Bengal	CQ-R	0.464646
Lao PDR	Attapeu	CQ-R	1
Lao PDR	Champasak	CQ-R	1
Lao PDR	Salavan	CQ-R	0.893617
Lao PDR	Savannakhet	CQ-R	0.866232
Lao PDR	Sekong	CQ-R	1
Myanmar	Bago	CQ-R	0.882353
Myanmar	Kayin	CQ-R	1
Myanmar	Mandalay	CQ-R	0.966102
Myanmar	Rakhine	CQ-R	0.707317
Thailand	Sisakhet	CQ-R	1
Thailand	Tak	CQ-R	1
Thailand	Ubon Ratchathani	CQ-R	1
Vietnam	Binh Phuoc	CQ-R	1
Vietnam	Dak Lak	CQ-R	0.99569
Vietnam	Dak Nong	CQ-R	1
Vietnam	Gia Lai	CQ-R	0.989348
Vietnam	Khanh Hoa	CQ-R	0.953125
Vietnam	Ninh Thuan	CQ-R	0.28125
Vietnam	Quang Tri	CQ-R	0.744186
