# Supplementary material for: Genetic surveillance in the Greater Mekong subregion and South Asia to support malaria control and elimination
Source: eLife. 2021 Aug 10;10:e62997. doi: 10.7554/eLife.62997 (PMC8354633; doi:10.7554/eLife.62997)
Supplement: Figure 3—figure supplement 4—source data 1. [file elife-62997-fig3-figsupp4-data1.xlsx]

## Sheet: Sheet1
Country	Province	Measure Names	Measure Values
Bangladesh	Chittagong	PYR-R	0.996914
Cambodia	Battambang	PYR-R	1
Cambodia	Pailin	PYR-R	1
Cambodia	Preah Vihear	PYR-R	1
Cambodia	Pursat	PYR-R	1
Cambodia	Ratanakiri	PYR-R	0.99705
Cambodia	Steung Treng	PYR-R	1
Congo PDR	Kinshasa	PYR-R	1
India	Odisha	PYR-R	0.550562
India	Tripura	PYR-R	1
India	West Bengal	PYR-R	0.717391
Lao PDR	Attapeu	PYR-R	1
Lao PDR	Champasak	PYR-R	0.995708
Lao PDR	Salavan	PYR-R	0.974874
Lao PDR	Savannakhet	PYR-R	0.960506
Lao PDR	Sekong	PYR-R	1
Myanmar	Bago	PYR-R	1
Myanmar	Kayin	PYR-R	1
Myanmar	Mandalay	PYR-R	0.966102
Myanmar	Rakhine	PYR-R	1
Thailand	Sisakhet	PYR-R	1
Thailand	Tak	PYR-R	1
Thailand	Ubon Ratchathani	PYR-R	1
Vietnam	Binh Phuoc	PYR-R	1
Vietnam	Dak Lak	PYR-R	1
Vietnam	Dak Nong	PYR-R	1
Vietnam	Gia Lai	PYR-R	0.998745
Vietnam	Khanh Hoa	PYR-R	1
Vietnam	Ninh Thuan	PYR-R	1
Vietnam	Quang Tri	PYR-R	0.75
