# Supplementary material for: Genetic surveillance in the Greater Mekong subregion and South Asia to support malaria control and elimination
Source: eLife. 2021 Aug 10;10:e62997. doi: 10.7554/eLife.62997 (PMC8354633; doi:10.7554/eLife.62997)
Supplement: Figure 3—figure supplement 5—source data 1. [file elife-62997-fig3-figsupp5-data1.xlsx]

## Sheet: Sheet1
Country	Province	Measure Names	Measure Values
Bangladesh	Chittagong	SD-R	0.872166
Cambodia	Battambang	SD-R	0.875
Cambodia	Pailin	SD-R	1
Cambodia	Preah Vihear	SD-R	0.942857
Cambodia	Pursat	SD-R	0.899083
Cambodia	Ratanakiri	SD-R	0.745583
Cambodia	Steung Treng	SD-R	0.970149
Congo PDR	Kinshasa	SD-R	0.485437
India	Odisha	SD-R	0.0625
India	Tripura	SD-R	0.986486
India	West Bengal	SD-R	0.138298
Lao PDR	Attapeu	SD-R	0.821818
Lao PDR	Champasak	SD-R	0.88412
Lao PDR	Salavan	SD-R	0.279793
Lao PDR	Savannakhet	SD-R	0.213703
Lao PDR	Sekong	SD-R	0.9
Myanmar	Bago	SD-R	1
Myanmar	Kayin	SD-R	0.555866
Myanmar	Mandalay	SD-R	0.965517
Myanmar	Rakhine	SD-R	1
Thailand	Sisakhet	SD-R	1
Thailand	Tak	SD-R	0.96
Thailand	Ubon Ratchathani	SD-R	0.894737
Vietnam	Binh Phuoc	SD-R	1
Vietnam	Dak Lak	SD-R	0.996212
Vietnam	Dak Nong	SD-R	0.97479
Vietnam	Gia Lai	SD-R	0.978535
Vietnam	Khanh Hoa	SD-R	0.972222
Vietnam	Ninh Thuan	SD-R	0.979167
Vietnam	Quang Tri	SD-R	0.581395
