# Supplementary material for: Genetic surveillance in the Greater Mekong subregion and South Asia to support malaria control and elimination
Source: eLife. 2021 Aug 10;10:e62997. doi: 10.7554/eLife.62997 (PMC8354633; doi:10.7554/eLife.62997)
Supplement: Figure 3—source data 1. [file elife-62997-fig3-data1.xlsx]

## Sheet: Sheet1
Country	Province	Measure Names	Measure Values
Bangladesh	Chittagong	ART-R	0
Cambodia	Battambang	ART-R	1
Cambodia	Pailin	ART-R	0.925373
Cambodia	Preah Vihear	ART-R	0.651376
Cambodia	Pursat	ART-R	0.880878
Cambodia	Ratanakiri	ART-R	0.476923
Cambodia	Steung Treng	ART-R	0.930556
Congo PDR	Kinshasa	ART-R	0
India	Odisha	ART-R	0
India	Tripura	ART-R	0
India	West Bengal	ART-R	0
Lao PDR	Attapeu	ART-R	0.462121
Lao PDR	Champasak	ART-R	0.650224
Lao PDR	Salavan	ART-R	0.163934
Lao PDR	Savannakhet	ART-R	0.0941558
Lao PDR	Sekong	ART-R	0.192308
Myanmar	Bago	ART-R	0
Myanmar	Kayin	ART-R	0.53304
Myanmar	Mandalay	ART-R	0.280702
Myanmar	Rakhine	ART-R	0
Thailand	Sisakhet	ART-R	1
Thailand	Tak	ART-R	0.608696
Thailand	Ubon Ratchathani	ART-R	0.842105
Vietnam	Binh Phuoc	ART-R	0.919048
Vietnam	Dak Lak	ART-R	0.959641
Vietnam	Dak Nong	ART-R	0.940678
Vietnam	Gia Lai	ART-R	0.837178
Vietnam	Khanh Hoa	ART-R	0.220588
Vietnam	Ninh Thuan	ART-R	0.125
Vietnam	Quang Tri	ART-R	0.157895
Bangladesh	Chittagong	DHA-PPQ-R	0
Cambodia	Battambang	DHA-PPQ-R	1
Cambodia	Pailin	DHA-PPQ-R	0.888889
Cambodia	Preah Vihear	DHA-PPQ-R	0.136364
Cambodia	Pursat	DHA-PPQ-R	0.646552
Cambodia	Ratanakiri	DHA-PPQ-R	0.397351
Cambodia	Steung Treng	DHA-PPQ-R	0.701754
Congo PDR	Kinshasa	DHA-PPQ-R	0
India	Odisha	DHA-PPQ-R	0
India	Tripura	DHA-PPQ-R	0
India	West Bengal	DHA-PPQ-R	0
Lao PDR	Attapeu	DHA-PPQ-R	0.313008
Lao PDR	Champasak	DHA-PPQ-R	0.559242
Lao PDR	Salavan	DHA-PPQ-R	0.00537634
Lao PDR	Savannakhet	DHA-PPQ-R	0
Lao PDR	Sekong	DHA-PPQ-R	0
Myanmar	Bago	DHA-PPQ-R	0
Myanmar	Kayin	DHA-PPQ-R	0
Myanmar	Mandalay	DHA-PPQ-R	0
Myanmar	Rakhine	DHA-PPQ-R	0
Thailand	Sisakhet	DHA-PPQ-R	0.939394
Thailand	Tak	DHA-PPQ-R	0
Thailand	Ubon Ratchathani	DHA-PPQ-R	0.588235
Vietnam	Binh Phuoc	DHA-PPQ-R	0.836257
Vietnam	Dak Lak	DHA-PPQ-R	0.856436
Vietnam	Dak Nong	DHA-PPQ-R	0.875
Vietnam	Gia Lai	DHA-PPQ-R	0.762044
Vietnam	Khanh Hoa	DHA-PPQ-R	0.0153846
Vietnam	Ninh Thuan	DHA-PPQ-R	0
Vietnam	Quang Tri	DHA-PPQ-R	0
