# Supplementary material for: Genetic surveillance in the Greater Mekong subregion and South Asia to support malaria control and elimination
Source: eLife. 2021 Aug 10;10:e62997. doi: 10.7554/eLife.62997 (PMC8354633; doi:10.7554/eLife.62997)
Supplement: Figure 4—figure supplement 1—source data 1. [file elife-62997-fig4-figsupp1-data1.xlsx]

## Sheet: Sheet1
District	ART-R	ART-R Count	PPQ-R	PPQ-R Count	DHA-PPQ-R	DHA-PPQ-R Count
Bac Ai	0.19	16	0.25	16	0	19
Bu Dang	0.93	14	1	10	0.9	10
Bu Dop	0.93	15	1	12	0.92	12
Bu Gia Map	0.94	329	0.91	269	0.84	256
Buon Don	0.94	49	0.86	43	0.78	41
Cu Jut	0.93	57	0.94	48	0.88	49
Dak Lak	0.97	89	0.88	96	0.85	82
Dakrong	0	10	-	-	0	10
Dong Ha	0.26	23	0.11	28	0	28
Duc Co	0.84	110	0.89	122	0.77	101
Ea Hleo	0.93	27	0.93	30	0.84	25
Ea Kar	1	27	1	26	1	26
Ea Sup	0.96	24	0.89	28	0.81	21
Gia Lai	0.77	78	0.7	76	0.64	75
Ia Grai	0.87	47	0.84	45	0.83	46
Ia Pa	0.26	78	0.33	58	0.2	79
Khanh Vinh	0.23	65	0.05	41	0.02	62
Kong Chro	0.4	10	-	-	-	-
Krong Pa	0.97	414	0.92	375	0.9	375
Tuy Duc	0.95	61	0.91	57	0.87	55
