# Supplementary material for: Genetic surveillance in the Greater Mekong subregion and South Asia to support malaria control and elimination
Source: eLife. 2021 Aug 10;10:e62997. doi: 10.7554/eLife.62997 (PMC8354633; doi:10.7554/eLife.62997)
Supplement: Figure 4—figure supplement 2—source data 1. [file elife-62997-fig4-figsupp2-data1.xlsx]

## Sheet: Sheet1
Province	KelchFreq	Number of Records
Binh Phuoc	WT	23
Dak Lak	WT	9
Dak Nong	WT	7
Gia Lai	WT	120
Khanh Hoa	WT	53
Ninh Thuan	WT	21
Quang Tri	WT	32
Binh Phuoc	C580Y	336
Dak Lak	C580Y	214
Dak Nong	C580Y	111
Gia Lai	C580Y	611
Khanh Hoa	C580Y	2
Ninh Thuan	C580Y	3
Quang Tri	C580Y	6
Gia Lai	P553L	1
Khanh Hoa	P553L	13
Gia Lai	C469F	4
Gia Lai	R539T	1
