# Supplementary material for: Genetic surveillance in the Greater Mekong subregion and South Asia to support malaria control and elimination
Source: eLife. 2021 Aug 10;10:e62997. doi: 10.7554/eLife.62997 (PMC8354633; doi:10.7554/eLife.62997)
Supplement: Figure 4—source data 1. [file elife-62997-fig4-data1.xlsx]

## Sheet: Sheet1
District	Season	Prop-DHA-PPQ-R	Number of Records
Buon Don	2017/18	0.87	30
Cu Jut	2017/18	1	37
Cu Mgar	2017/18	1	6
Dak Lak	2017/18	0.8	51
Duc Co	2017/18	0.8	79
Ea Hleo	2017/18	0.86	21
Ea Kar	2017/18	1	2
Ea Sup	2017/18	0.78	18
Gia Lai	2017/18	0.6	58
Ia Grai	2017/18	0.88	40
Ia Pa	2017/18	0.15	48
Kong Chro	2017/18	0.25	8
Krong Nang	2017/18	1	1
Krong Pa	2017/18	0.59	69
Tuy Duc	2017/18	0.87	55
Buon Don	2018/19	0.5	10
Cu Jut	2018/19	0.4	10
Dak Lak	2018/19	0.96	25
Duc Co	2018/19	0.65	20
Ea Hleo	2018/19	0.75	4
Ea Kar	2018/19	1	24
Ea Sup	2018/19	1	2
Gia Lai	2018/19	0.81	16
Ia Grai	2018/19	0.5	6
Ia Pa	2018/19	0.29	31
Kong Chro	2018/19	1	1
Krong Pa	2018/19	0.97	306
