# Supplementary material for: Genetic surveillance in the Greater Mekong subregion and South Asia to support malaria control and elimination
Source: eLife. 2021 Aug 10;10:e62997. doi: 10.7554/eLife.62997 (PMC8354633; doi:10.7554/eLife.62997)
Supplement: Figure 5—figure supplement 1—source data 1. [file elife-62997-fig5-figsupp1-data1.xlsx]

## Sheet: Sheet1
Province	KelchFreq	Number of Records
Attapeu	WT	142
Champasak	WT	78
Salavan	WT	153
Savannakhet	WT	558
Sekong	WT	16
Attapeu	C580Y	112
Champasak	C580Y	143
Salavan	C580Y	28
Savannakhet	C580Y	43
Attapeu	R539T	10
Champasak	R539T	2
Savannakhet	Y493H	10
Sekong	Y493H	1
Salavan	P574L	2
Savannakhet	P574L	5
