# Supplementary material for: Genetic surveillance in the Greater Mekong subregion and South Asia to support malaria control and elimination
Source: eLife. 2021 Aug 10;10:e62997. doi: 10.7554/eLife.62997 (PMC8354633; doi:10.7554/eLife.62997)
Supplement: Figure 5—source data 1. [file elife-62997-fig5-data1.xlsx]

## Sheet: Sheet1
District	ART-R	ART-R Count	DHA-PPQ-R	DHA-PPQ-R Count
Khong	0.65	110	0.62	106
Mounlapamok	0.73	22	0.6	20
Sanamxay	0.47	15	0.4	15
Phouvong	0.38	159	0.23	148
Pathoumphone	0.71	62	0.6	55
Attapeu	0.61	28	0.48	27
Xaysetha	0.62	55	0.45	49
Pakse	-	-	0.3	10
Paksong	0.55	20	0.2	20
Sekong	0.08	13	0	15
Vapy	0.53	30	0	28
Salavan	0.42	12	0.1	10
Toomlarn	0.25	32	0	31
Thapanthong	0.8	20	0	16
Ta Oy	0.01	107	0	115
Nong	0.06	411	0	410
Phine	0.03	34	0	34
Savannakhet	0.09	55	0	54
Sepone	0.12	92	0	90
