# Supplementary material for: Genetic surveillance in the Greater Mekong subregion and South Asia to support malaria control and elimination
Source: eLife. 2021 Aug 10;10:e62997. doi: 10.7554/eLife.62997 (PMC8354633; doi:10.7554/eLife.62997)
Supplement: Supplementary file 1. [file elife-62997-supp1.xlsx]

## Sheet: Sheet1
Region	Code	Year of Collection								Total		Supplementary Table 1 - Geographical breakdown by year of samples processed by GenRe-Mekong
		2012	2013	2014	2015	2016	2017	2018	2019
Bangladesh	BD				949	1210	24			2183
DR Congo	CD				41	191				232
India	IN					83	208	12		303
Cambodia	KH	116	178	257	152	354	190	15		1262
Lao PDR	LA				11	4	680	875		1570
Myanmar	MM				112	791	457			1360
Thailand	TH		9	7	82	20	51	77		246
Vietnam	VN				36	276	888	1126	141	2467
Total		116	187	264	1383	2929	2498	2105	141	9623
