# Supplementary material for: Genetic surveillance in the Greater Mekong subregion and South Asia to support malaria control and elimination
Source: eLife. 2021 Aug 10;10:e62997. doi: 10.7554/eLife.62997 (PMC8354633; doi:10.7554/eLife.62997)
Supplement: Supplementary file 2. [file elife-62997-supp2.xlsx]

## Sheet: Sheet1
Country	Province, State or Division	# samples processed			Supplementary Table 2 - Counts of processed samples, by province/state/division of origin.
India	Odisha	116
	West Bengal	103
	Tripura	84
Bangladesh	Chittagong	2183
Myanmar	Rakhine	56
	Bago	109
	Mandalay	125
	Kayin	1070
Thailand	Tak	30
	Sisakhet	172
	Ubon Ratchathani	44
Cambodia	Pailin	133
	Battambang	69
	Pursat	473
	Preah Vihear	142
	Stueng Traeng	78
	Ratanakiri	367
Lao PDR	Champasak	271
	Attapeu	315
	Sekong	47
	Salavan	210
	Savannakhet	727
Vietnam	Binh Phuoc	967
	Dak Nong	141
	Dak Lak	288
	Gia Lai	882
	Khanh Hoa	78
	Ninh Thuan	62
	Quang Tri	49
DR Congo	Kinshasa	232
Grand Total		9623
