# Supplementary material for: Genetic surveillance in the Greater Mekong subregion and South Asia to support malaria control and elimination
Source: eLife. 2021 Aug 10;10:e62997. doi: 10.7554/eLife.62997 (PMC8354633; doi:10.7554/eLife.62997)
Supplement: Supplementary file 3. [file elife-62997-supp3.xlsx]

## Sheet: Sheet1
Country	Province, State or Division	None	C580Y	P441L	F446I	R561H	G449A	M562I	M476I	Y493H	R539T	P553L	C469F	G533S	G538V	P574L	A578S	Singleton	Total		Supplementary Table 3 - Number of samples carrying mutations in the resistance domains of kelch13 by province/state/division. Mutations found only in single samples are grouped together in the “singleton” column. For clarity, heterozygous samples (i.e. samples where both mutant and wild-type parasites were detected) are excluded.
India	Odisha	79																	79
	West Bengal	79															1		80
	Tripura	66																	66
Bangladesh	Chittagong	1523															5	1	1529
Myanmar	Rakhine	43																	43
	Bago	33																	33
	Mandalay	41			8	8												1	58
	Kayin	318	18	110	75	53	55	38	36				5	5	8			4	725
Thailand	Tak	9	13											3				2	27
	Sisakhet		80																80
	Ubon Ratchathani	3	14								2								19
Cambodia	Pailin	5	62																67
	Battambang		31																31
	Pursat	38	262							18	1							1	320
	Preah Vihear	38	68							2	1								109
	Steung Treng	5	66								1								72
	Ratanakiri	170	149							2	1	3							325
Laos	Champasak	78	143								2								223
	Attapeu	142	112								10								264
	Sekong	21	2							3									26
	Salavan	153	28													2			183
	Savannakhet	558	43							10						5			616
Vietnam	Binh Phuoc	51	579																630
	Dak Nong	7	111																118
	Dak Lak	9	214																223
	Gia Lai	120	611								1	1	4						737
	Khanh Hoa	53	2									13							68
	Ninh Thuan	21	3																24
	Quang Tri	32	6																38
Congo PDR	Kinshasa	116															1		117
Total		3811	2617	110	83	61	55	38	36	35	19	17	9	8	8	7	7	9	6930
